# Supplementary material
Source: PubMed Central journal article supplement (PMC6641984)

**A**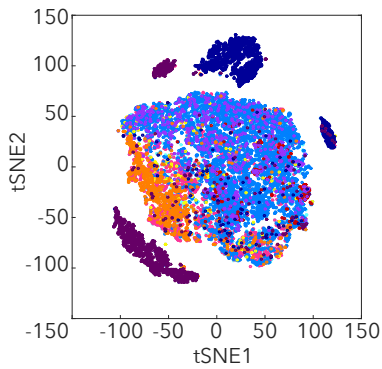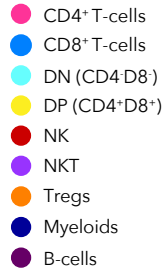

Average percentage of cells

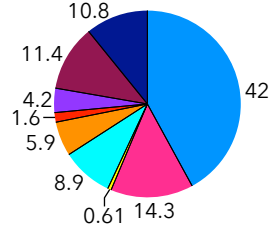**B**

Unsupervised analysis

● G1- B-cells

● G2- Plasma cells

● G3- Monocytes/Macrophages

● G4- Dendritic cells

● G5- Lymphocytes

● G6- Exhausted CD8<sup>+</sup> T-cells

● G7- Regulatory T-cells

● G8- Cytotoxicity (Lymphocytes)

● G9- Exhausted/HS CD8<sup>+</sup> T-cells

● G10- Memory T-cells

● G11- Lymphocytes exhausted/cell-cycle

Supervised analysis

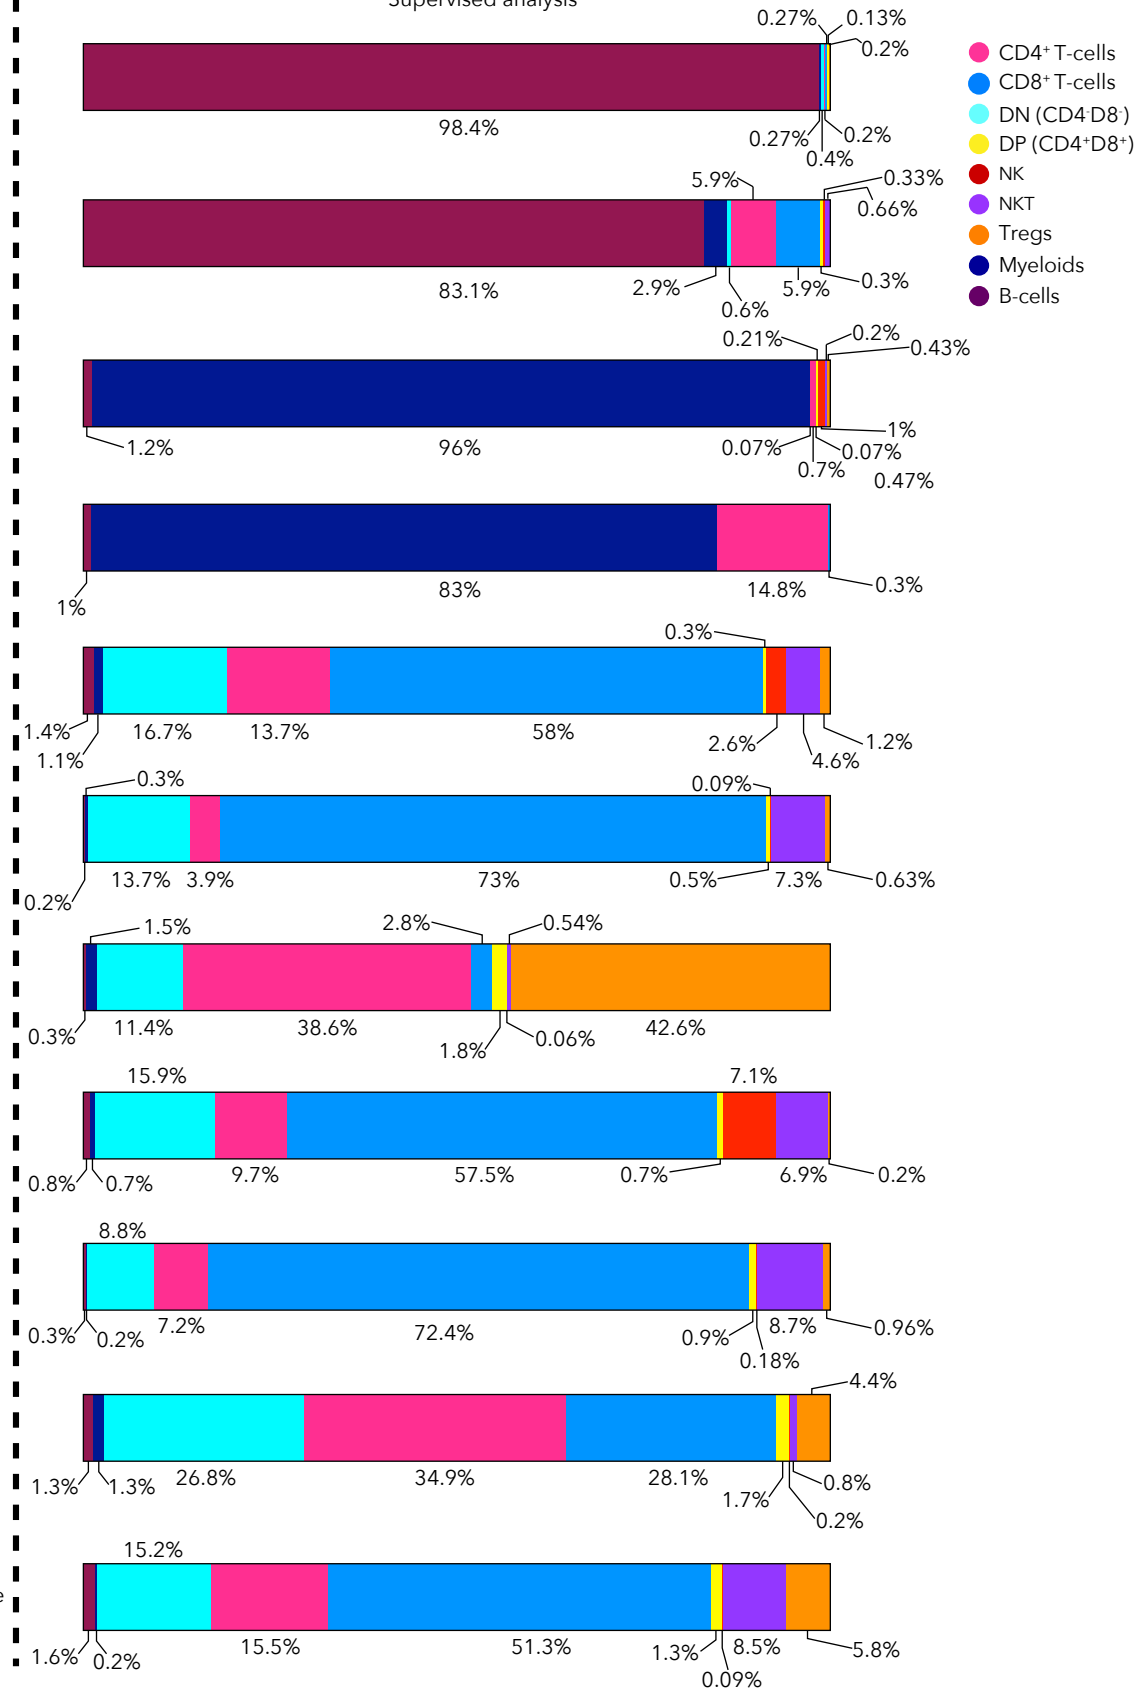

Supplement: NIHMS1510803-supplement-1.pdf [file NIHMS1510803-supplement-1.pdf]
