# Supplementary material
Source: PubMed Central journal article supplement (PMC6641984)

**A**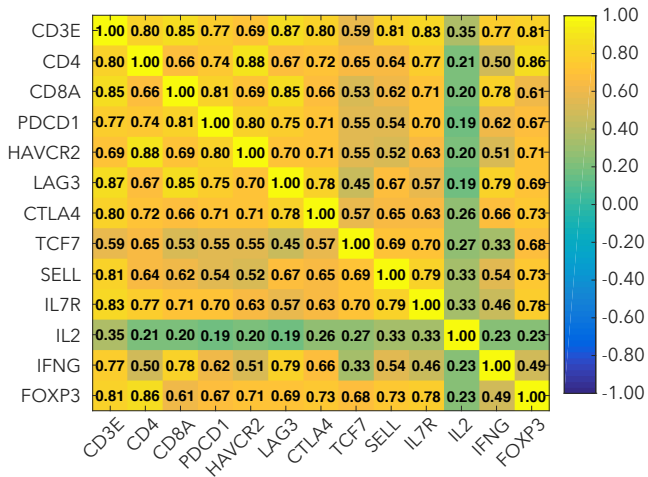**B**

| Gene name (correlation with CD3) | R    | P-value               |
|----------------------------------|------|-----------------------|
| PDCD1                            | 0.77 | $2.1 \times 10^{-8}$  |
| HAVCR2                           | 0.69 | $4.4 \times 10^{-6}$  |
| LAG3                             | 0.86 | $4.7 \times 10^{-12}$ |
| CTLA4                            | 0.79 | $2.9 \times 10^{-9}$  |
| TCF7                             | 0.58 | $1.2 \times 10^{-4}$  |
| SELL                             | 0.81 | $1.3 \times 10^{-7}$  |
| IL7R                             | 0.83 | $4.6 \times 10^{-8}$  |
| FOXP3                            | 0.8  | $8.3 \times 10^{-5}$  |

**C**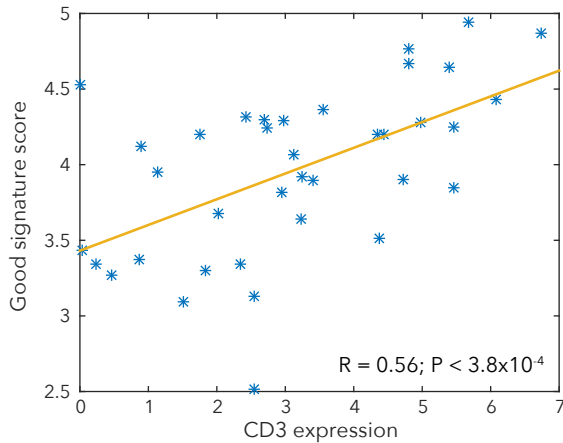**D**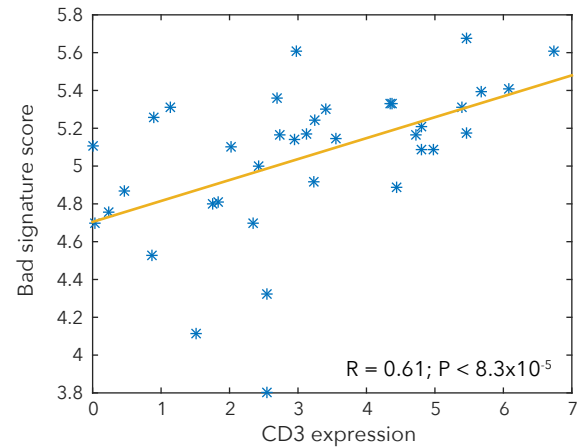**E**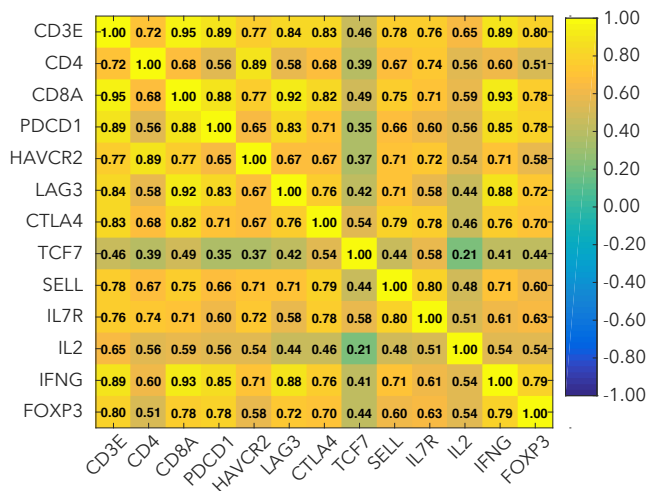**F**

| Gene name (correlation with CD3) | R    | P-value               |
|----------------------------------|------|-----------------------|
| PDCD1                            | 0.89 | $1 \times 10^{-18}$   |
| TIM3                             | 0.77 | $2.7 \times 10^{-11}$ |
| LAG3                             | 0.83 | $2 \times 10^{-14}$   |
| CTLA4                            | 0.83 | $4.5 \times 10^{-14}$ |
| TCF7                             | 0.45 | $7.2 \times 10^{-4}$  |
| SELL                             | 0.77 | $1.8 \times 10^{-11}$ |
| IL7R                             | 0.75 | $1.3 \times 10^{-10}$ |
| FOXP3                            | 0.79 | $2.1 \times 10^{-18}$ |

**G**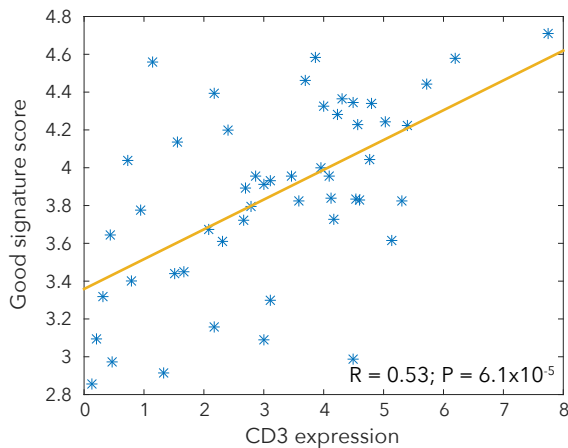**H**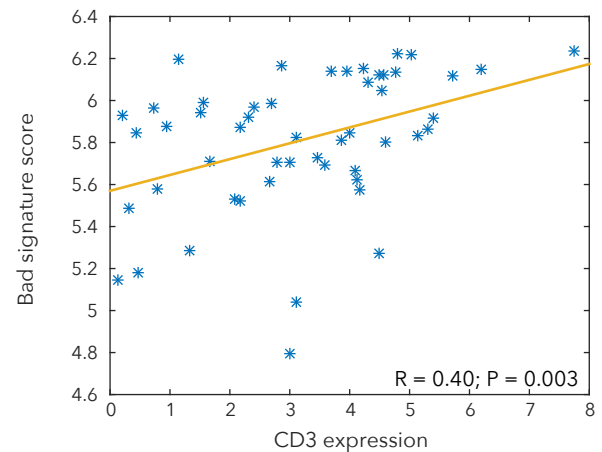

Supplement: NIHMS1510803-supplement-7.pdf [file NIHMS1510803-supplement-7.pdf]
