# Supplementary material
Source: PubMed Central journal article supplement (PMC6641984)

**A**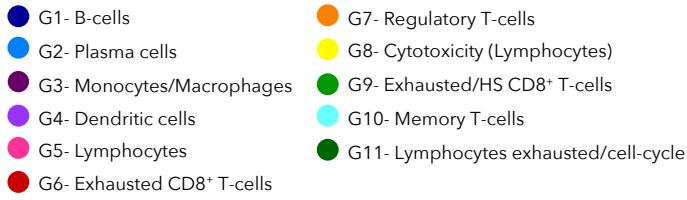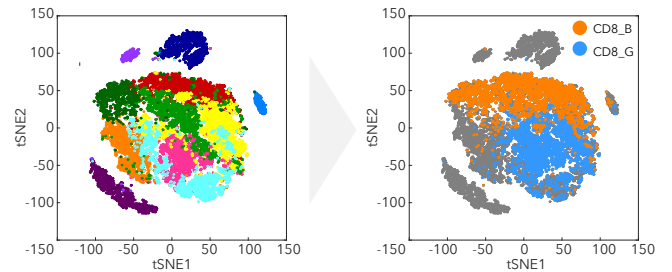**B**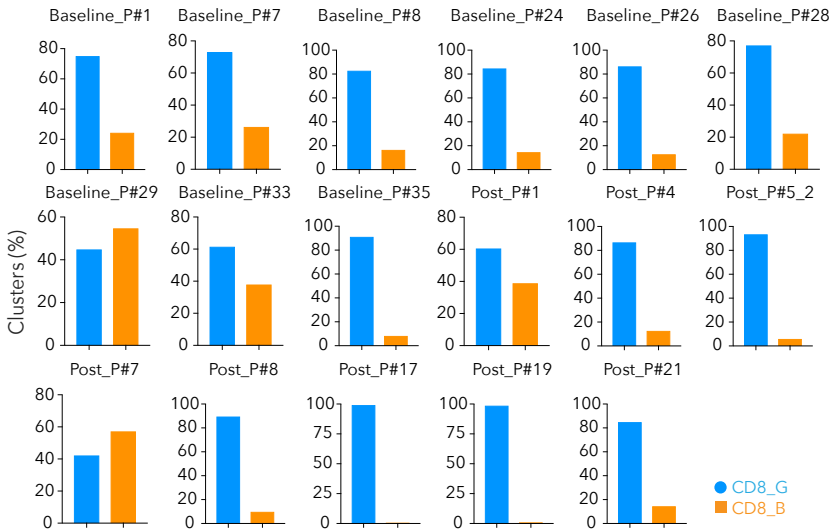**F**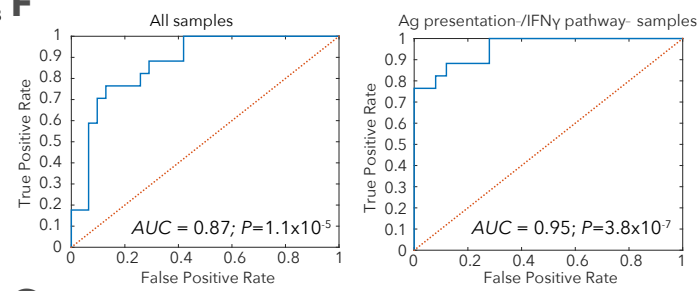**C**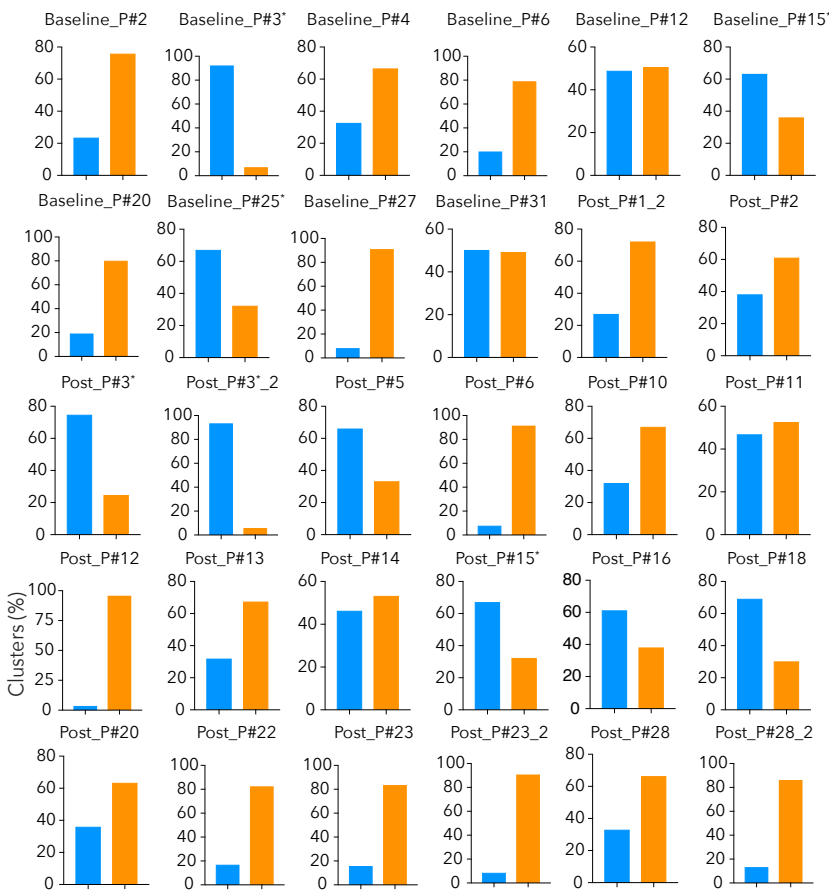**G**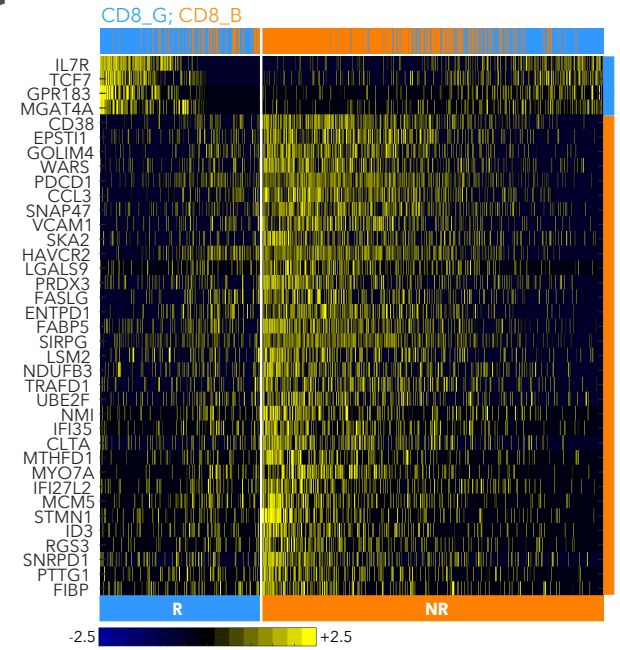**H**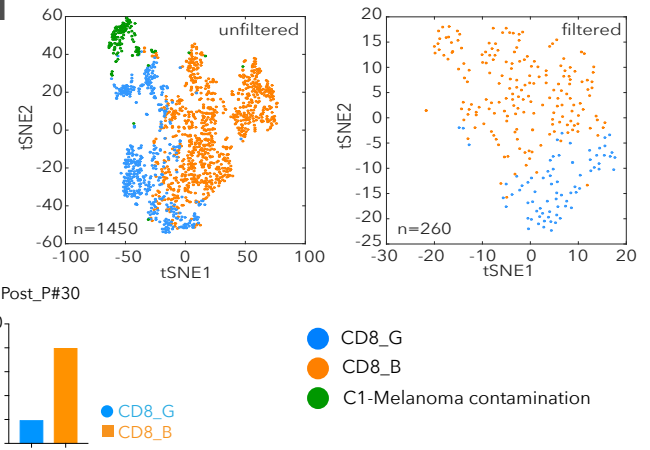**D**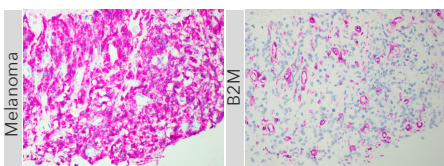**E**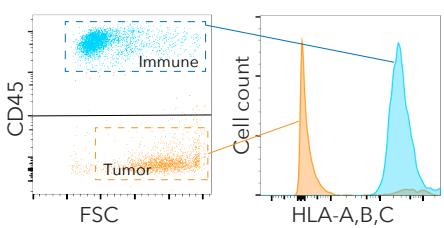**I**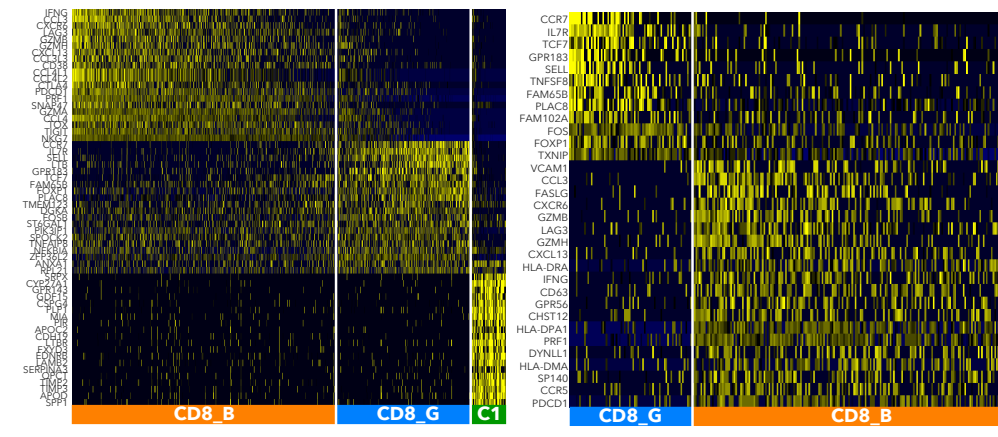

Supplement: NIHMS1510803-supplement-2.pdf [file NIHMS1510803-supplement-2.pdf]

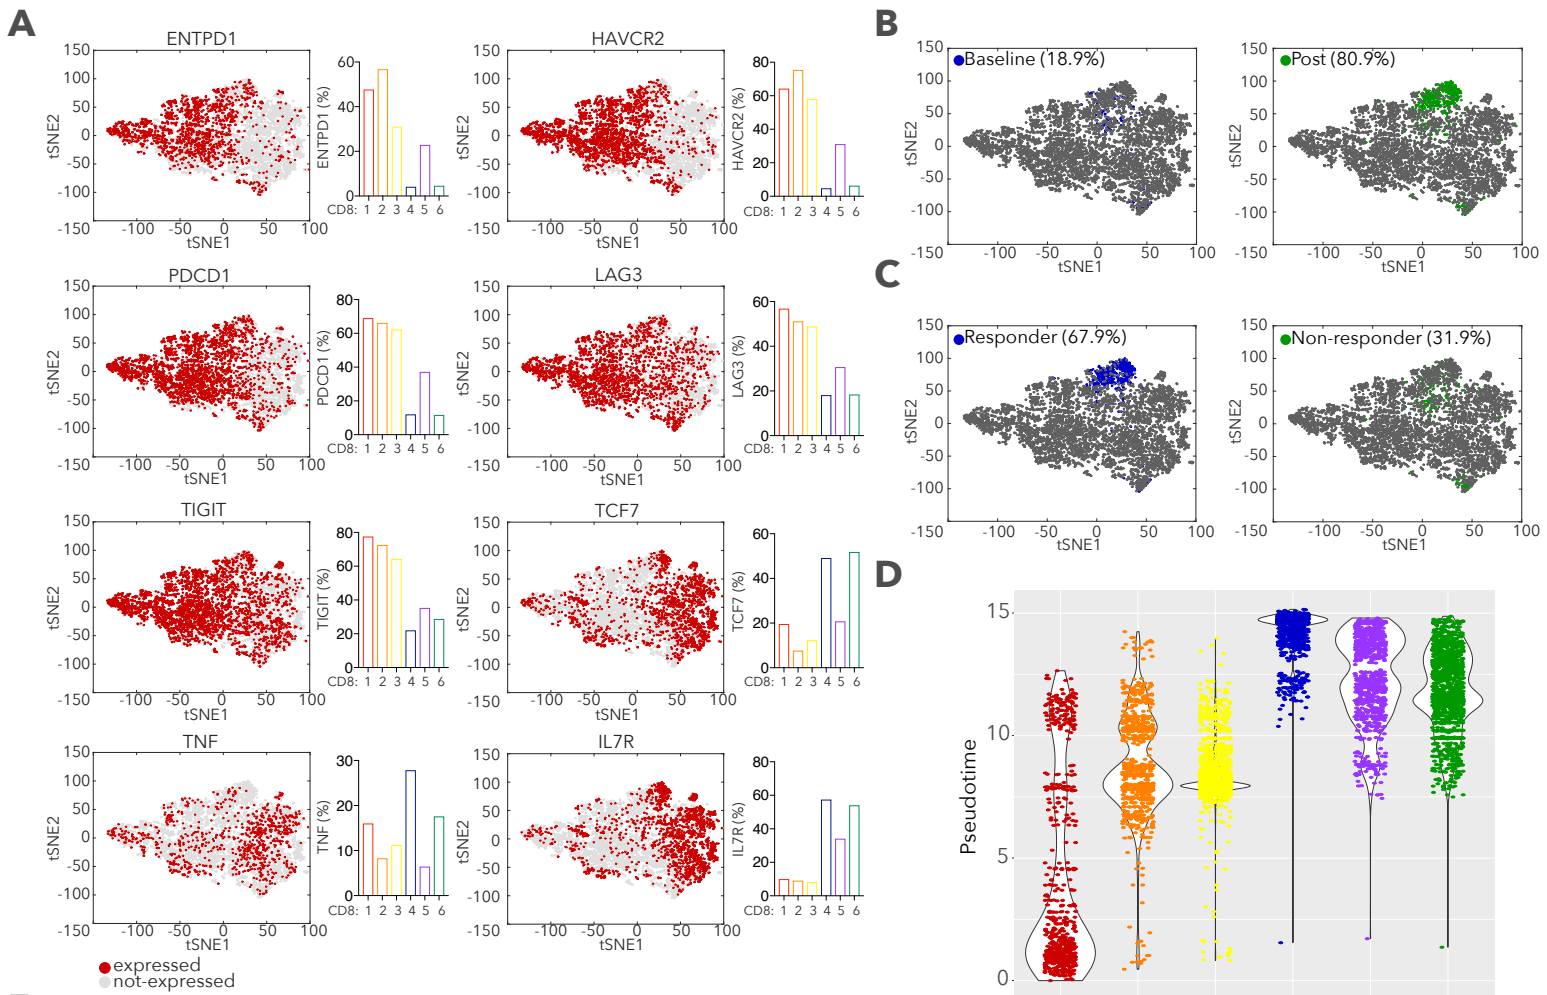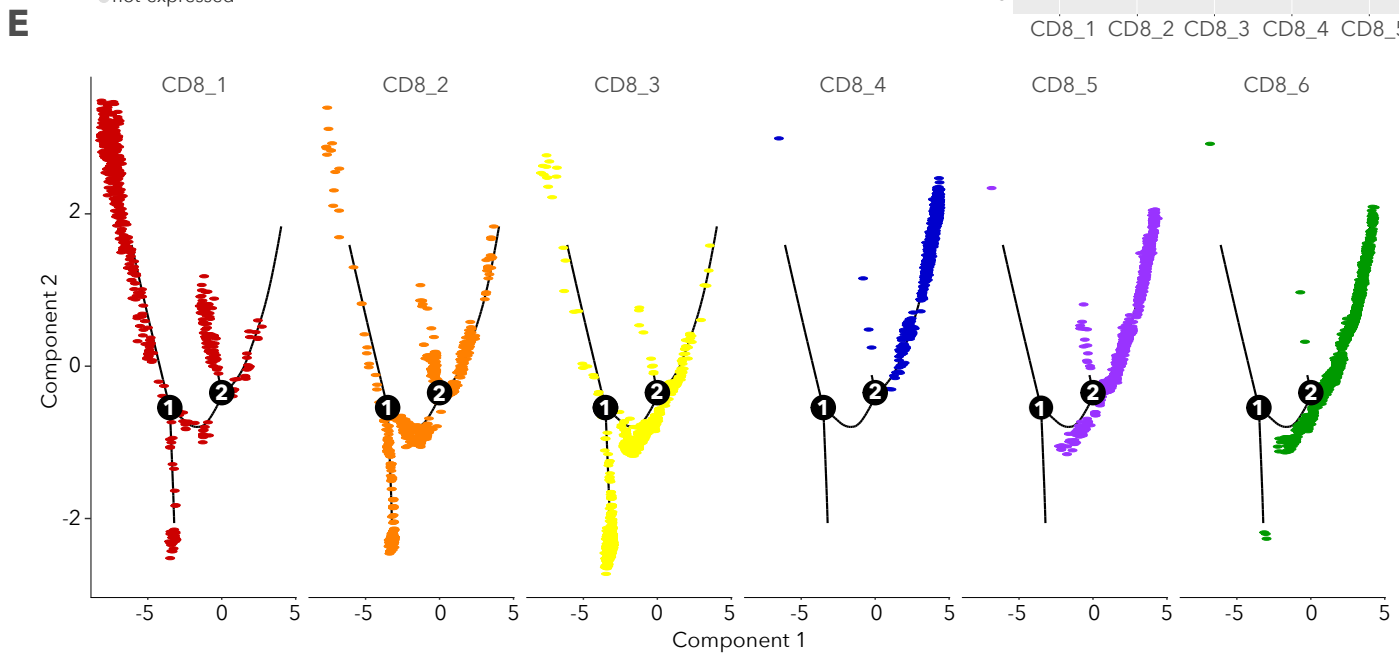

Supplement: NIHMS1510803-supplement-3.pdf [file NIHMS1510803-supplement-3.pdf]

**A**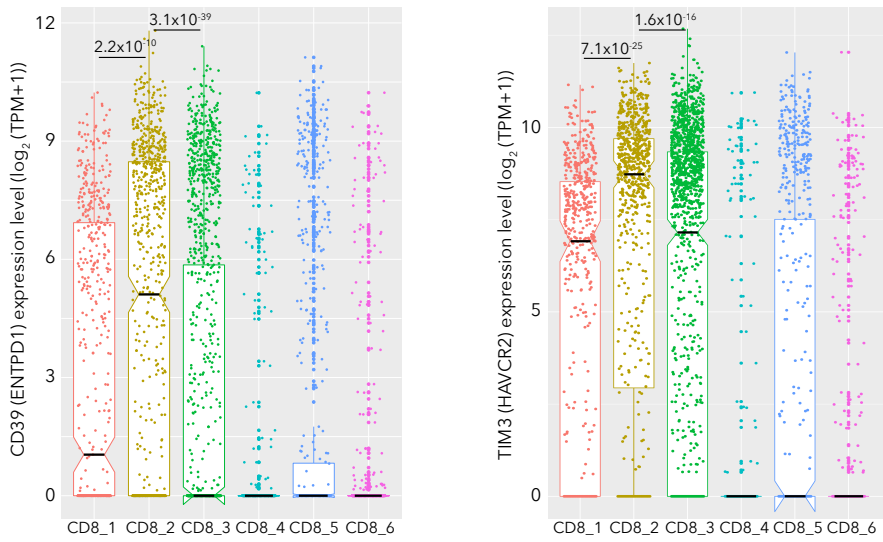**B**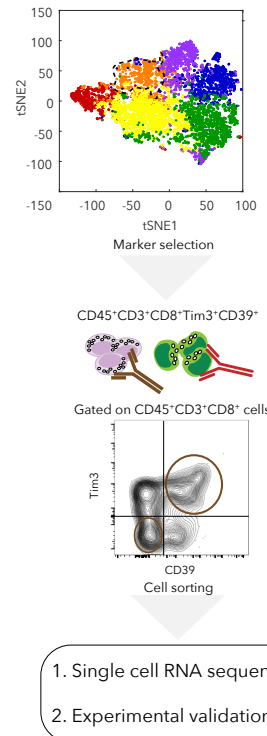**C**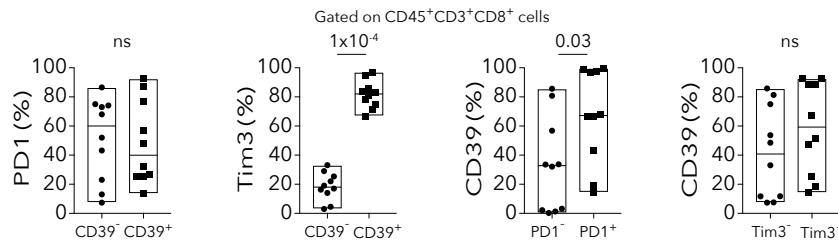**D**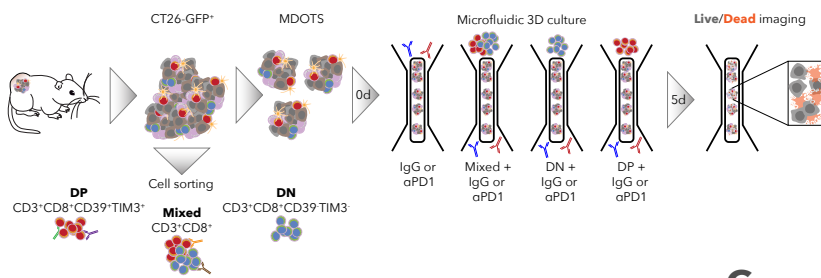**E**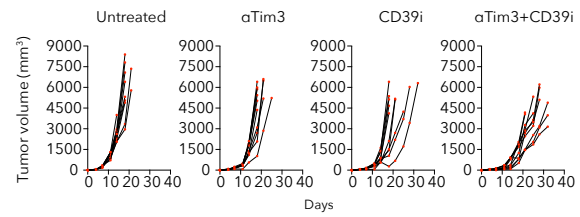**F**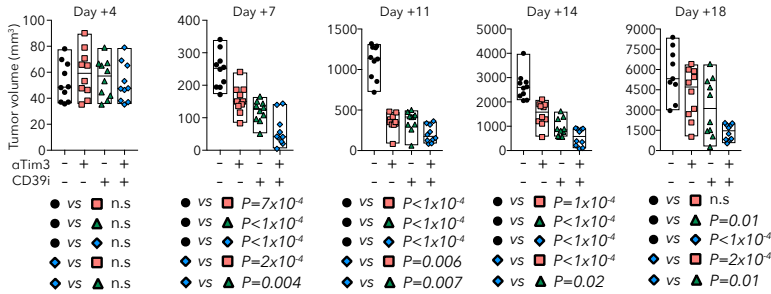**G**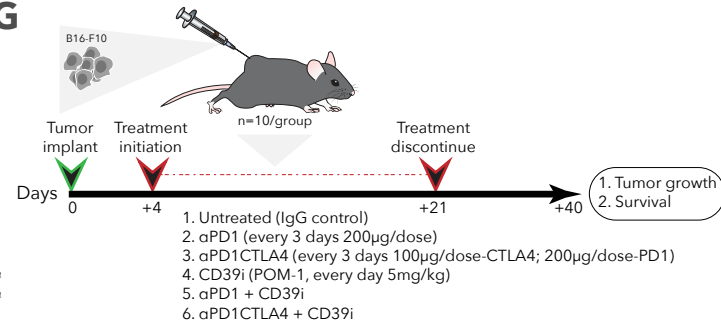**H**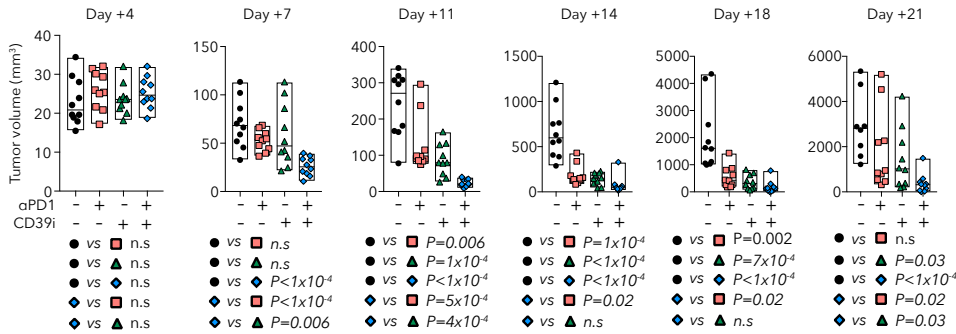**J**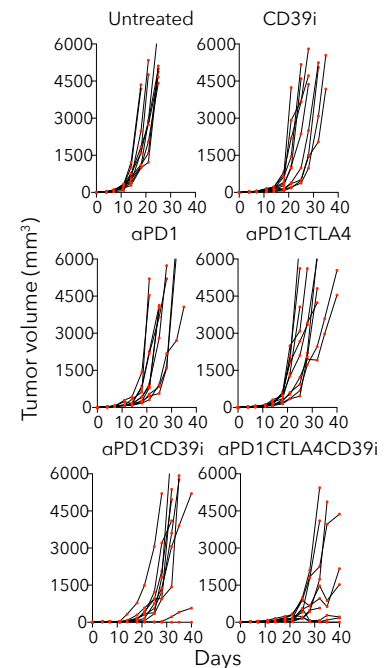**I**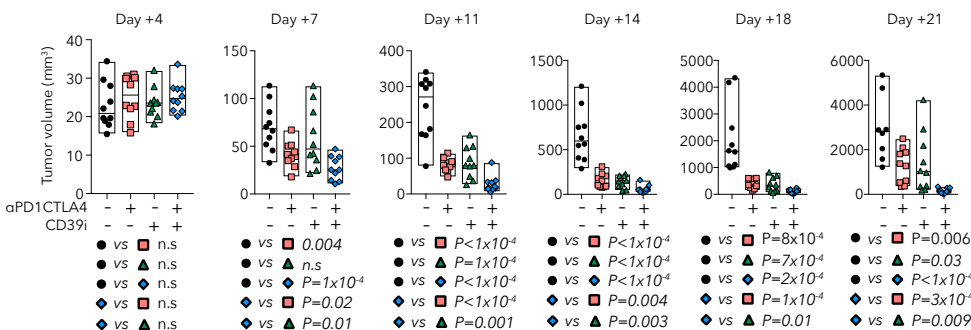

Supplement: NIHMS1510803-supplement-4.pdf [file NIHMS1510803-supplement-4.pdf]

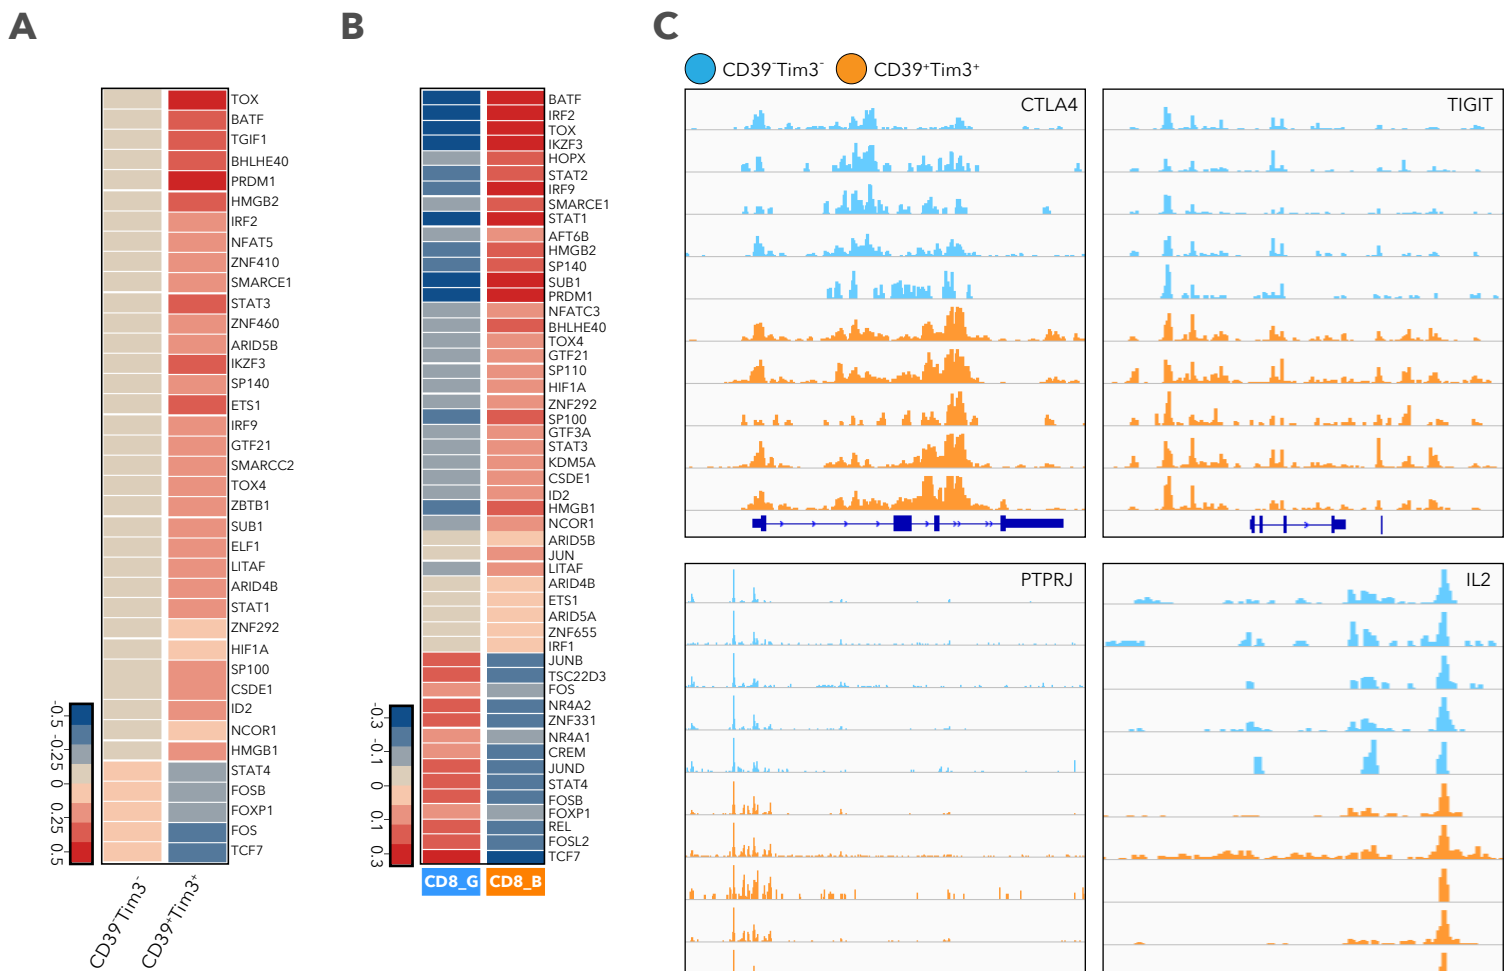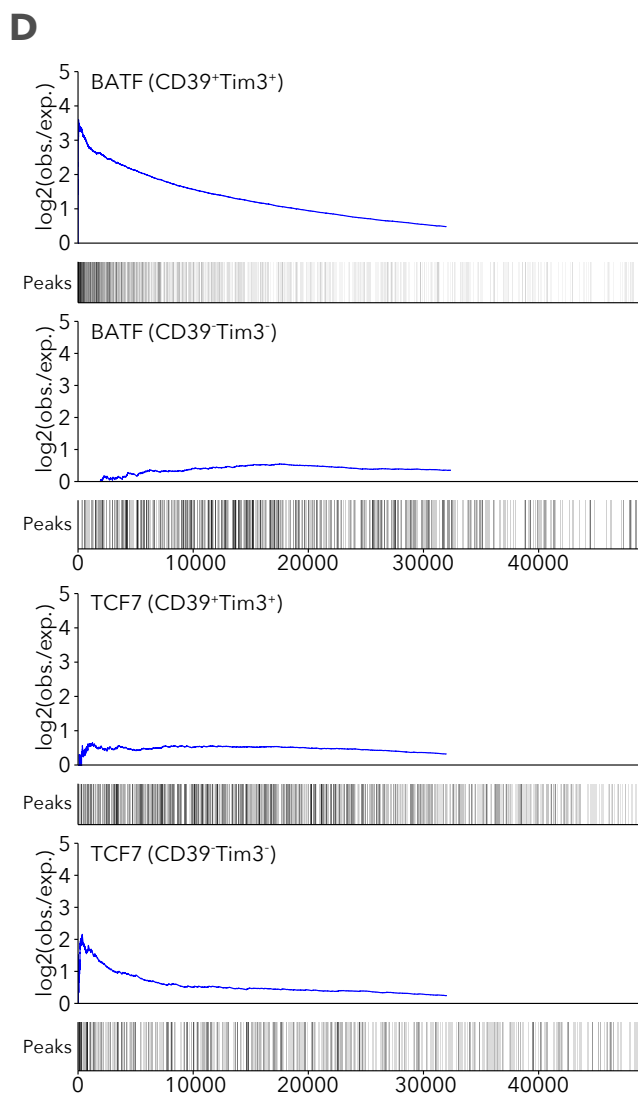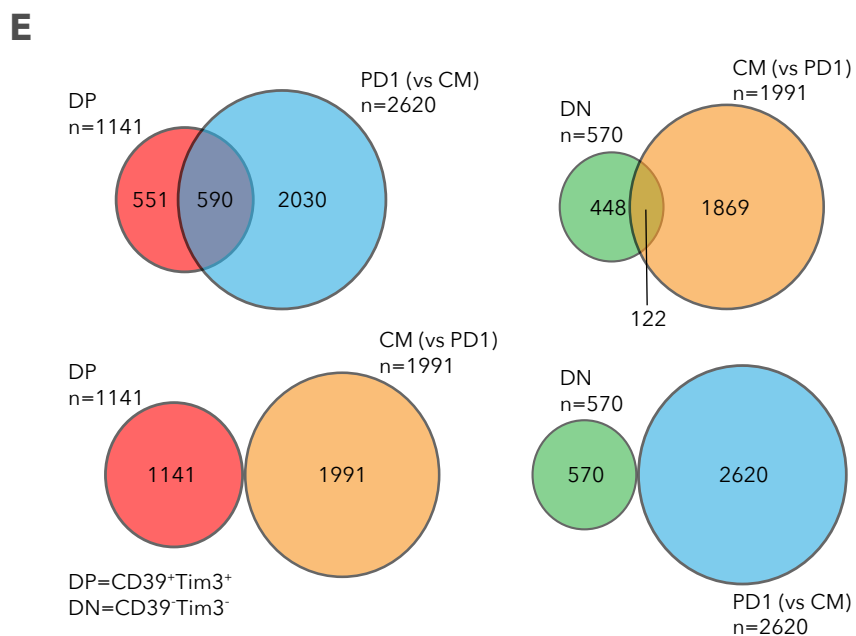

Supplement: NIHMS1510803-supplement-6.pdf [file NIHMS1510803-supplement-6.pdf]

**A**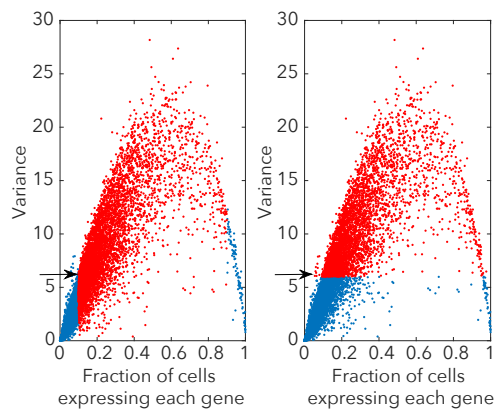**B**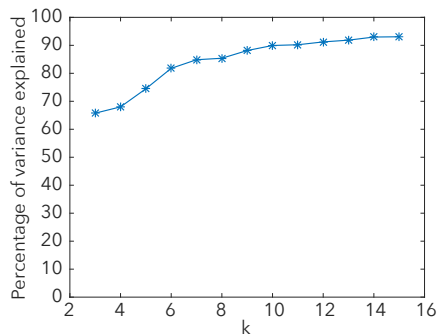**C**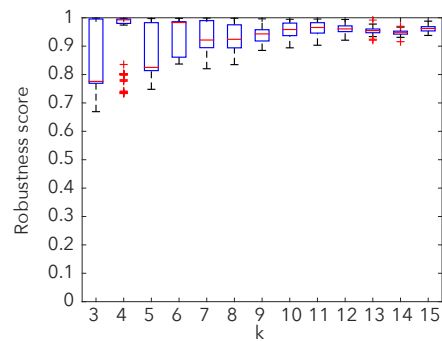**D**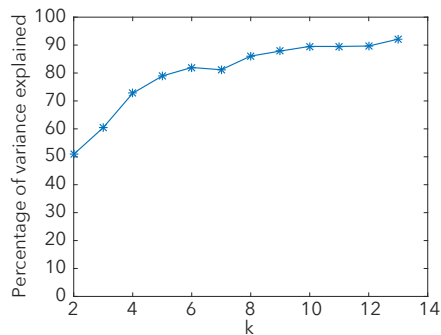**E**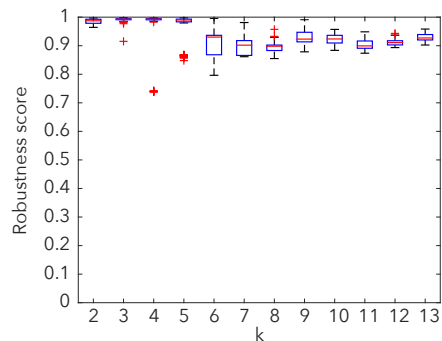**F**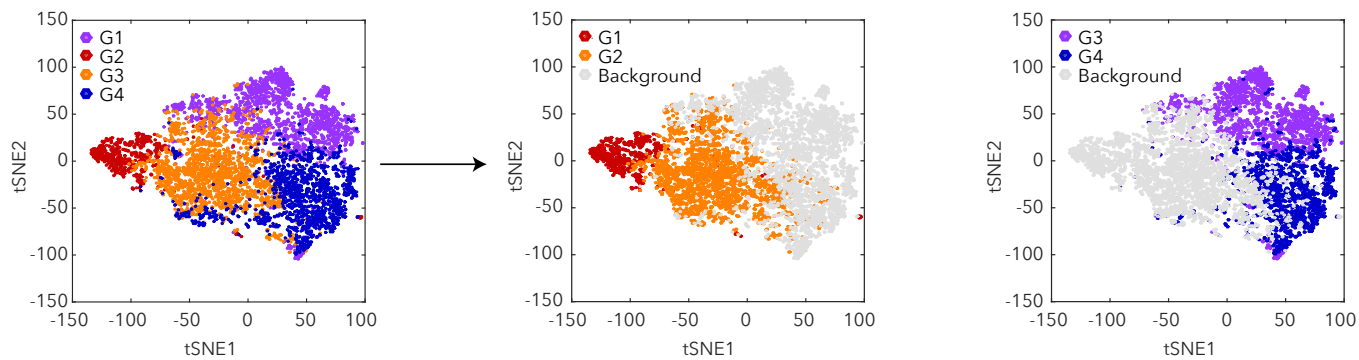**G**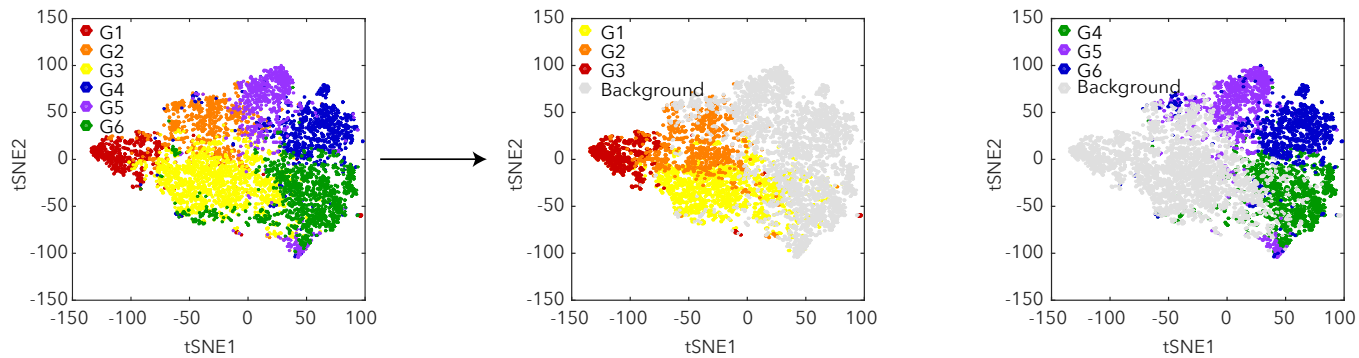

Supplement: NIHMS1510803-supplement-8.pdf [file NIHMS1510803-supplement-8.pdf]
